# Supplementary material
Source: Springer Nature journal article supplement (https://www.springermedizin.de/resource/supplementary/12876_2008_429_MOESM2_ESM.pdf/9436990)

### by TaqMan

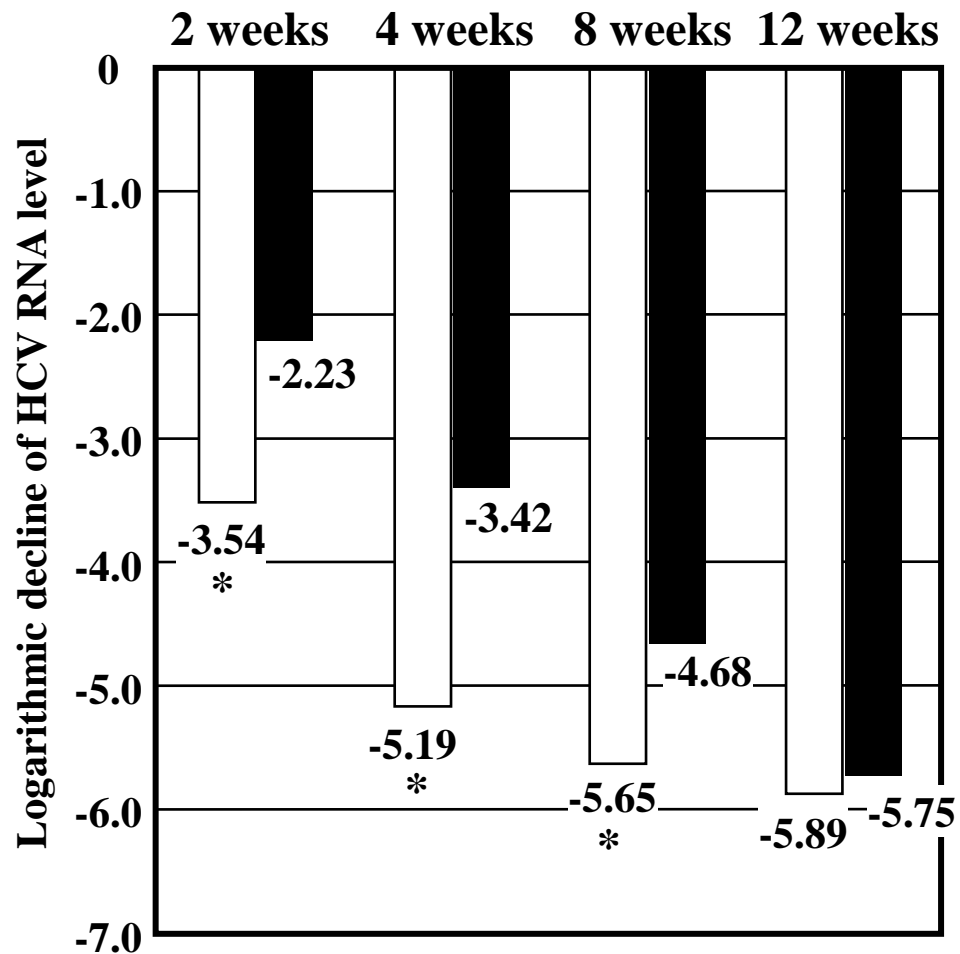

\* vs. non-SVR, all  $P < 0.001$

□ SVR (n=39)

### by Amplicor-10 fold

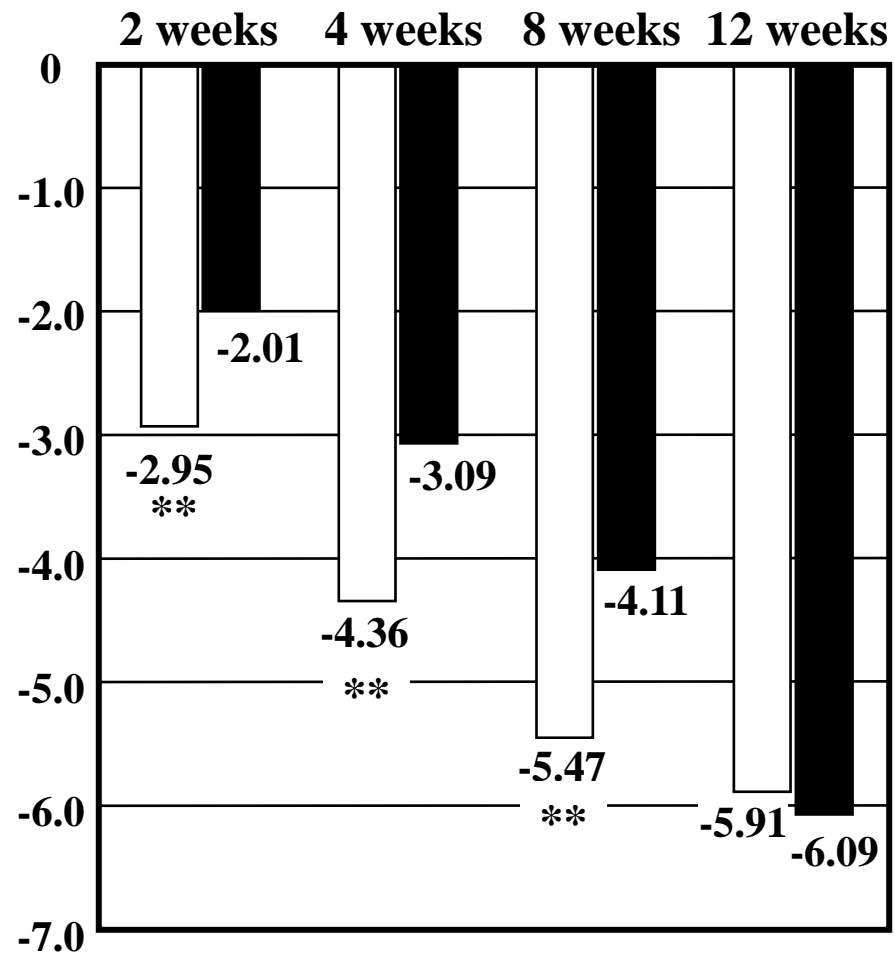

\*\* vs. non-SVR, all  $P < 0.01$

■ non-SVR (n=41)

Supplement: MOESM2 [file 9436990]
